# Supplementary material for: A theoretical assessment of microplastic transport in river catchments and their retention by soils and river sediments
Source: Royal Society of Chemistry journal article supplement (doi:10.1039/c6em00206d), 2016-01-01
Supplement: c6em00206d1.pdf [file c6em00206d1.pdf]

Supplementary information to

**A theoretical assessment of microplastic transport in river catchments and their retention by soils and river sediments.**

Luca Nizzetto<sup>1,2\*</sup>, Gianbattista Bussi<sup>3</sup>, Martyn N. Futter<sup>4</sup>, Dan Butterfield<sup>1</sup>, Paul G. Whitehead<sup>3</sup>

<sup>1</sup>Norwegian Institute for Water Research, NO-0349, Oslo, Norway.

<sup>2</sup>Research Centre for Toxic Compounds in the Environment, Masaryk University, 62500, Brno, Czech Republic.

<sup>3</sup>School of Geography and the Environment, University of Oxford, South Parks Road, Oxford, OX1 3QY, UK.

<sup>4</sup>Department of Aquatic Sciences and Assessment, Swedish University of Agricultural Sciences, Uppsala, Sweden.

Contact information

Luca Nizzetto

[Luca.nizzetto@niva.no](mailto:Luca.nizzetto@niva.no)

+47 98215393



Table S1. Summary of MP properties, and sources (data extracted from ref <sup>1-3</sup>)

| Polymer type                          | Density (kg m <sup>-3</sup> ) | Common uses                                                         | On-land sources of MP                                                                                       | Pathway to streams                                                                 | MP Size range (mm) |
|---------------------------------------|-------------------------------|---------------------------------------------------------------------|-------------------------------------------------------------------------------------------------------------|------------------------------------------------------------------------------------|--------------------|
| Polystyrene (expanded) (EPS)          | 16-640                        | Bait boxes, floats, cups , expanded packaging                       | Households and laundry dust                                                                                 | municipal wastewater effluents                                                     | 0.01-0.1           |
|                                       |                               |                                                                     | Breaking down of larger items in landfills/recycling facilities/littering                                   | Industrial wastewater effluents, Surface run-off                                   | 0.5-5              |
| Polypropylene (PP)                    | 900-920                       | Rope, bottle caps, gear, strapping, personal care products          | Discharge of primary MP containing personal care products                                                   | municipal wastewater effluents                                                     | 0.005-0.8          |
|                                       |                               |                                                                     | Unintentional spill of pellets during production and transport                                              | Industrial wastewater effluents, Surface run-off                                   | 1-3                |
|                                       |                               |                                                                     | Breaking down of larger items in landfills/recycling facilities/littering                                   | Industrial wastewater effluents, Surface run-off                                   | 0.005-5            |
| Polyethylene (PE)                     | 910-940                       | Plastic bags, bottles, six-pack rings, gear, personal care products | Discharge of primary MP containing personal care products                                                   | municipal wastewater effluents                                                     | 0.005-0.8          |
|                                       |                               |                                                                     | Unintentional spill of pellets during production and transport                                              | Industrial wastewater effluents, Surface run-off                                   | 1-3                |
|                                       |                               |                                                                     | Breaking down of larger items in landfills/recycling facilities/littering                                   | Industrial wastewater effluents, Surface run-off                                   | 0.005-1            |
| Styrene Butadiene Rubber (SBR)        | 940                           | Roofing felt and car tyres                                          | City dust, Car tyre abrasion                                                                                | surface run-off, municipal wastewater effluents, canalization, Wind/precipitations | 0.06-0.1           |
|                                       |                               |                                                                     | Releases from MP containing sewage sludge applied to soil                                                   | Surface run-off                                                                    | 0.005-1            |
| Acrylonitrile Butadiene Styrene (ABS) | 1030-1110                     | Electronics and electrics, car interior, toys                       | Unintentional spill of pellets during production and transport                                              | Industrial wastewater effluents, Surface run-off                                   | 1-3                |
|                                       |                               |                                                                     | Abrasion and breaking down during processing or product usage                                               | Industrial wastewater effluents, Surface run-off                                   | 0.005-0.5          |
| Polystyrene (PS)                      | 1040-1090                     | Utensils, containers, packaging                                     | Households and laundry dust                                                                                 | municipal wastewater effluents                                                     | 0.01-0.1           |
|                                       |                               |                                                                     | Unintentional spill of pellets during production and transport                                              | Industrial wastewater effluents, Surface run-off                                   | 0.15-3             |
|                                       |                               |                                                                     | Breaking down of larger items in landfills/recycling facilities/littering                                   | Industrial wastewater effluents, Surface run-off                                   | 0.005-5            |
|                                       |                               |                                                                     | Abrasion and breaking down during processing or product usage/releases of beads during industrial processes | Industrial wastewater effluents, Surface run-off                                   | 0.005-0.9          |
|                                       |                               |                                                                     | Releases from MP containing sewage sludge applied to soil                                                   | Surface run-off                                                                    | 0.01-0.1           |
|                                       |                               |                                                                     | Households and laundry dust                                                                                 | municipal wastewater effluents                                                     | 0.01-0.1           |

|                          |           |                                   |                                                                                                             |                                                                                    |           |
|--------------------------|-----------|-----------------------------------|-------------------------------------------------------------------------------------------------------------|------------------------------------------------------------------------------------|-----------|
|                          |           |                                   | City dust                                                                                                   | surface run-off, municipal wastewater effluents, canalization, Wind/precipitations | 0.06-0.1  |
|                          |           |                                   | Surface weathering                                                                                          | surface run-off, municipal wastewater effluents, canalization                      | 0.05-1    |
|                          |           |                                   | Surface abrasion/deflashing processes                                                                       | Industrial wastewater effluents, Surface run-off                                   | 0.005-1   |
|                          |           |                                   | Breaking down of larger items in landfills/recycling facilities/littering                                   | Industrial wastewater effluents, Surface run-off                                   | 0.005-1   |
|                          |           |                                   | Releases from MP containing sewage sludge applied to soil                                                   | Surface run-off                                                                    | 0.01-0.1  |
| Polyamide or nylon (PA)  | 1130-1150 | Gear, rope, textiles              | Households and laundry dust                                                                                 | municipal wastewater effluents                                                     | 0.01-0.1  |
|                          |           |                                   | City dust                                                                                                   | surface run-off, municipal wastewater effluents, canalization, Wind/precipitations | 0.06-0.1  |
|                          |           |                                   | Abrasion and breaking down during processing or product usage/releases of beads during industrial processes | Industrial wastewater effluents, Surface run-off                                   | 0.005-0.9 |
|                          |           |                                   | Releases from MP containing sewage sludge applied to soil                                                   | Surface run-off                                                                    | 0.05-5    |
| Polyvinyl chloride (PVC) | 1160-1300 | Film, pipe, containers, carpentry | Unintentional spill of pellets during production and transport                                              | Industrial wastewater effluents, Surface run-off                                   | 1-3       |
|                          |           |                                   | Breaking down of larger items in landfills/recycling facilities/littering                                   | Industrial wastewater effluents, Surface run-off                                   | 0.005-5   |
|                          |           |                                   | Surface abrasion/deflashing/industrial processing                                                           | Industrial wastewater effluents, Surface run-off                                   | 0.005-1   |
|                          |           |                                   | Weathering of PVC containing products during use                                                            | surface run-off from urban areas, municipal wastewater effluents, canalization,    | 0.06-0.1  |
| Polyurethane (PUR)       | 1200      | Insulation, filling materials     | Coating erosion and abrasive blasting activities                                                            | Industrial wastewater effluents, Surface run-off, canalization                     | 0.1-5     |
|                          |           |                                   | Breaking down of larger items in landfills/recycling facilities/littering                                   | Industrial wastewater effluents, Surface run-off, canalization                     | 0.005-5   |
|                          |           |                                   | Releases from MP containing sewage sludge applied to soil                                                   | Surface run-off                                                                    | 0.05-5    |
| Poly(lactic acid) (PLA)  | 1210-1430 | Packaging, cups, mulch fim        | Breaking down of larger items in landfills/recycling facilities/littering                                   | Industrial wastewater effluents, Surface run-off                                   | 0.005-5   |
|                          |           |                                   | Surface abrasion/deflashing/industrial processing                                                           | Industrial wastewater effluents, Surface run-off                                   | 0.005-1   |
|                          |           |                                   | Weathering of PVC containing products                                                                       | surface run-off from urban areas,                                                  |           |

|                                          |           |                                                                                                                                                    |                                                                           |                                                                                 |           |
|------------------------------------------|-----------|----------------------------------------------------------------------------------------------------------------------------------------------------|---------------------------------------------------------------------------|---------------------------------------------------------------------------------|-----------|
|                                          |           |                                                                                                                                                    | during use                                                                | municipal wastewater effluents, canalization,                                   |           |
| Polyethylene terephthalate (PET)         | 1340-1390 | Bottles, strapping, gear, textile                                                                                                                  | Unintentional spill of pellets during production and transport            | Industrial wastewater effluents, Surface run-off                                | 1-3       |
|                                          |           |                                                                                                                                                    | Households and laundry dust                                               | municipal wastewater effluents                                                  | 0.01-0.1  |
|                                          |           |                                                                                                                                                    | Breaking down of larger items in landfills/recycling facilities/littering | Industrial wastewater effluents, Surface run-off                                | 0.005-5   |
|                                          |           |                                                                                                                                                    | Weathering of PVC containing products during use                          | surface run-off from urban areas, municipal wastewater effluents, canalization, | 0.06-0.1  |
| Polyester resin + glass fibers           | 1350      | Textiles, leisure boats, furnitures                                                                                                                | Surface abrasion/deflashing/industrial processing                         | Industrial wastewater effluents, Surface run-off                                | 0.005-1   |
|                                          |           |                                                                                                                                                    | Households and laundry dust                                               | municipal wastewater effluents                                                  | 0.01-0.1  |
|                                          |           |                                                                                                                                                    | Breaking down of larger items in landfills/recycling facilities/littering | Industrial wastewater effluents, Surface run-off                                | 0.005-5   |
|                                          |           |                                                                                                                                                    | Weathering of PVC containing products during use                          | surface run-off from urban areas, municipal wastewater effluents, canalization, | 0.06-0.1  |
| Polyethersulfone (PES)                   | 1370      | Personal care products, lighting fixtures, Electrics and electronics, Surgical and medical devices, Automotive components, Food service components | Discharge of primary MP containing personal care products                 | municipal wastewater effluents                                                  | 0.005-0.8 |
|                                          |           |                                                                                                                                                    | Unintentional spill of pellets during production and transport            | Industrial wastewater effluents, Surface run-off                                | 1-2       |
|                                          |           |                                                                                                                                                    | Breaking down of larger items in landfills/recycling facilities/littering | Industrial wastewater effluents, Surface run-off                                | 0.005-1   |
|                                          |           |                                                                                                                                                    | Releases from MP containing sewage sludge applied to soil                 | Surface run-off                                                                 | 0.005-1   |
| Polytetrafluorethylene PTFE (aka Teflon) | 2200      | Personal care products, sealing, mechanical and industrial components                                                                              | Discharge of primary MP containing personal care products                 | municipal wastewater effluents                                                  | 0.005-0.8 |
|                                          |           |                                                                                                                                                    | Abrasion and breaking down during processing or product usage             | Industrial wastewater effluents, Surface run-off                                | 0.005-0.5 |
|                                          |           |                                                                                                                                                    | Releases from MP containing sewage sludge applied to soil                 | Surface run-off                                                                 | 0.05-5    |

Table S2. The subcatchment information of the Thames system

| No. | Reach Name                   | Length (m) | Area (m <sup>2</sup> ) | Land use % |         |        |       |
|-----|------------------------------|------------|------------------------|------------|---------|--------|-------|
|     |                              |            |                        | Arable     | Pasture | Forest | Urban |
| 1   | Crickdale Castle to Pinkhill | 54100      | 1609                   | 74.4       | 16.5    | 2.8    | 6.3   |
| 2   | Pinkhill to Osney            | 12420      | 526                    | 60.3       | 16.3    | 5.0    | 18.5  |
| 3   | Osney to Culham              | 18960      | 1288                   | 72.5       | 15.3    | 2.2    | 10.0  |
| 4   | Days Weir                    | 9320       | 58                     | 78.9       | 0.0     | 2.8    | 18.3  |
| 5   | Days Weir to Caversham       | 35150      | 1154                   | 72.9       | 10.3    | 8.2    | 8.6   |
| 6   | Caversham to Shepperton      | 70410      | 3632                   | 44.0       | 12.2    | 15.1   | 28.7  |
| 7   | Mosley                       | 9540       | 1102                   | 38.9       | 13.1    | 25.3   | 22.7  |
| 8   | Teddington                   | 7740       | 589                    | 30.6       | 15.4    | 17.7   | 36.3  |

Table S3. Statistic of the relationship between observed and predicted data of water discharge and suspended sediments.

| No. | Reach Name                   | Water discharge N-S coefficient | Water discharge R <sup>2</sup> | Suspended sediment R <sup>2</sup> | Suspended sediments Percent bias |
|-----|------------------------------|---------------------------------|--------------------------------|-----------------------------------|----------------------------------|
| 1   | Crickdale Castle to Pinkhill | 0.77                            | 0.89                           | 0.27                              | 4.6                              |
| 2   | Pinkhill to Osney            | 0.63                            | 0.88                           |                                   |                                  |
| 3   | Osney to Culham              | 0.82                            | 0.91                           |                                   |                                  |
| 4   | Days Weir                    | 0.82                            | 0.92                           | 0.39                              | 18.7                             |
| 5   | Days Weir to Caversham       | 0.83                            | 0.91                           | 0.47                              | -19.6                            |
| 6   | Caversham to Shepperton      | 0.79                            | 0.93                           | 0.54                              | 16.2                             |
| 7   | Mosley                       | 0.76                            | 0.93                           |                                   |                                  |
| 8   | Teddington                   | 0.77                            | 0.93                           | 0.64                              | 6.5                              |

**Figure S1.** Modelled (red lines) and observed (dotted line) data of water discharge in 3 selected reaches of the Thames

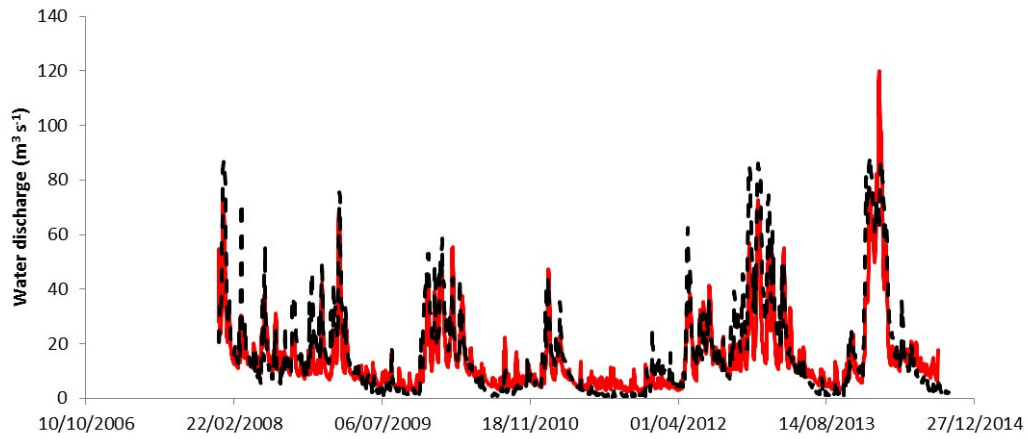

REACH 5

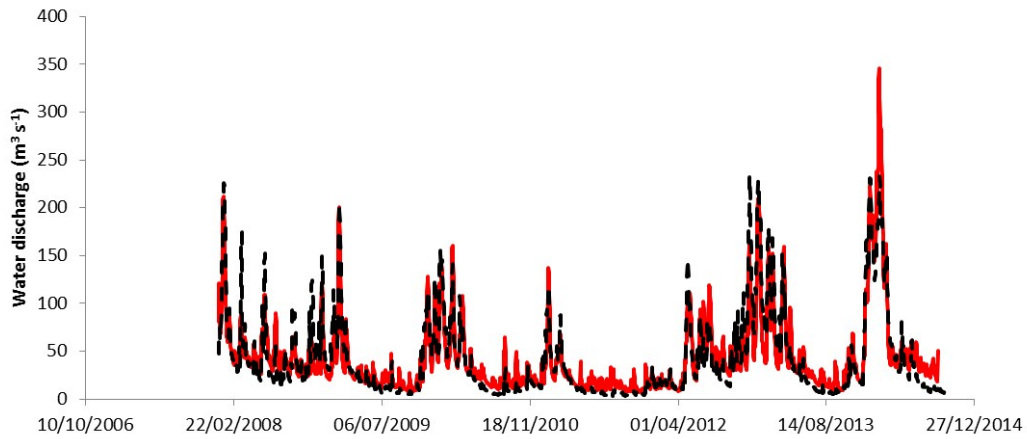

REACH 8

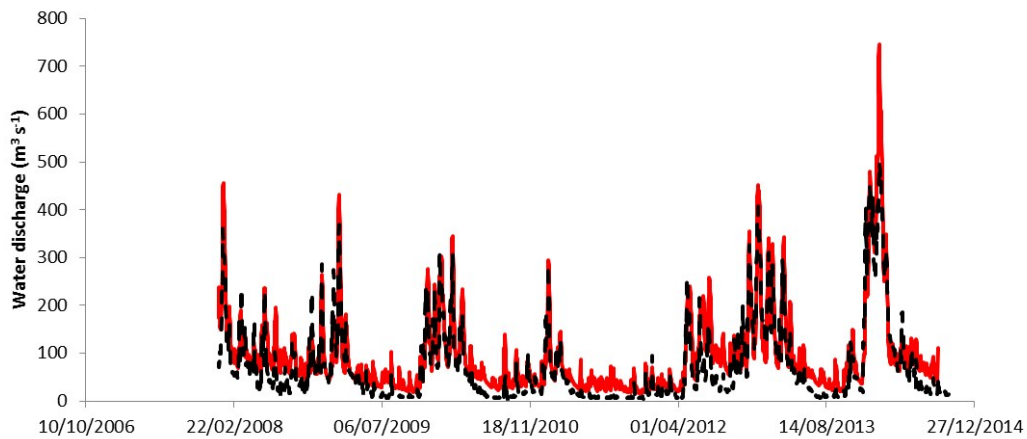

**Figure S2.** Modelled (red line) and observed (dots) data of suspended sediment concentrations in three selected reaches of the Thames

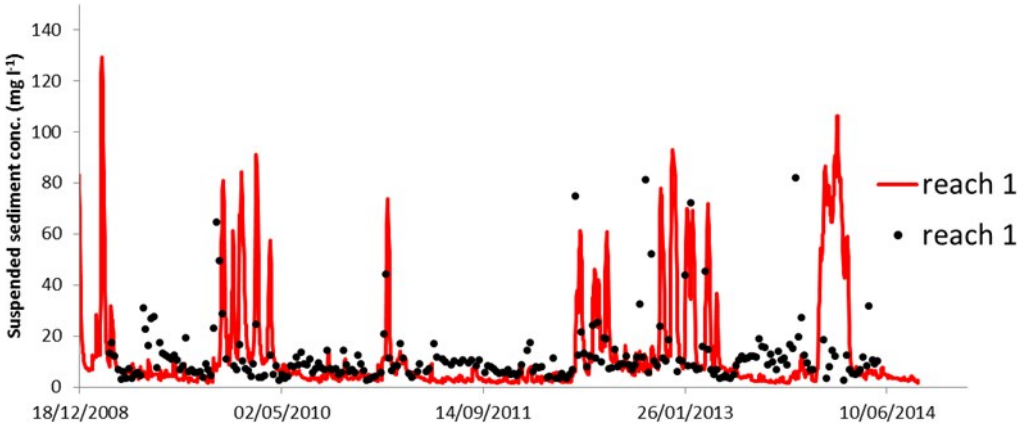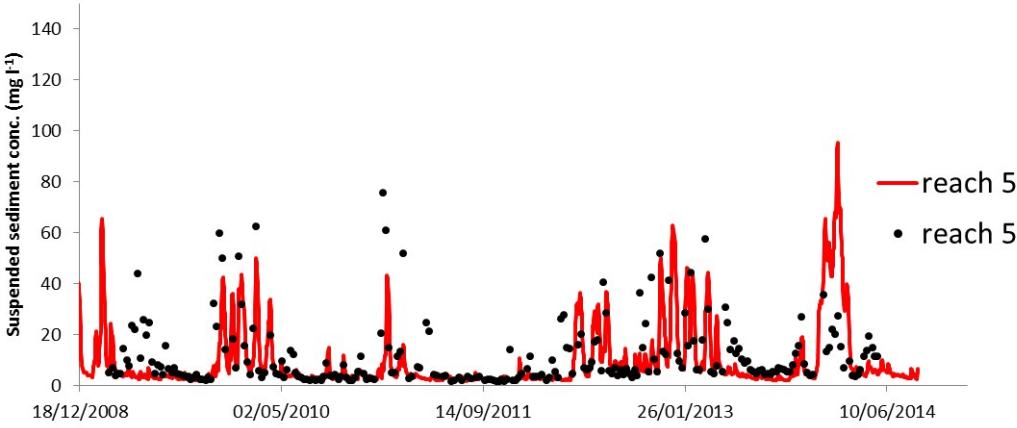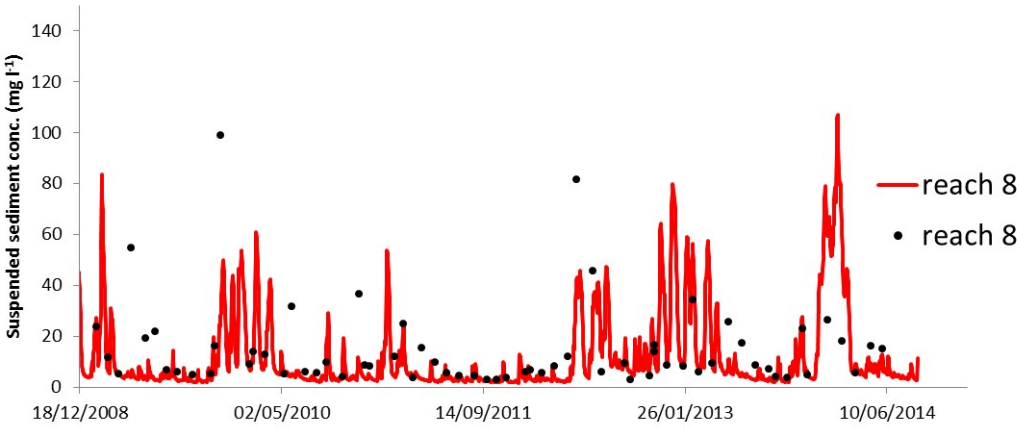



## References

1. Lassen C., S. F. Hansen, K. Magnusson, F. Noren, N. I. Bloch Hartmann, P. R. Jensen, T. G. Nielsen and A. Brinch, *Microplastics - Occurrence, effects and sources of releases to the environment in Denmark*, Copenhagen, 2015.
2. P. Sundt, P.-E. Schulze and F. Syversen, *Sources of microplastics-pollution to the marine environmnet*, Report M-321|2015, Mepex, 2014.
3. K. Magnusson, K. Eliasson, A. Fråne, K. Haikonen, J. Hultén, M. Olshammar, J. Stadmark and A. Voisin, *Swedish sources and pathways for microplastics to the marine environment*, IVL Swedish Environmental Research Institute, 2013.
